# Supplementary material
Source: MDPI journal article supplement (https://www.mdpi.com/2071-1050/15/1/260)
Supplement: s1 [file s1 › sustainability-2066720-supplementary.pdf]

## Supplementary Materials

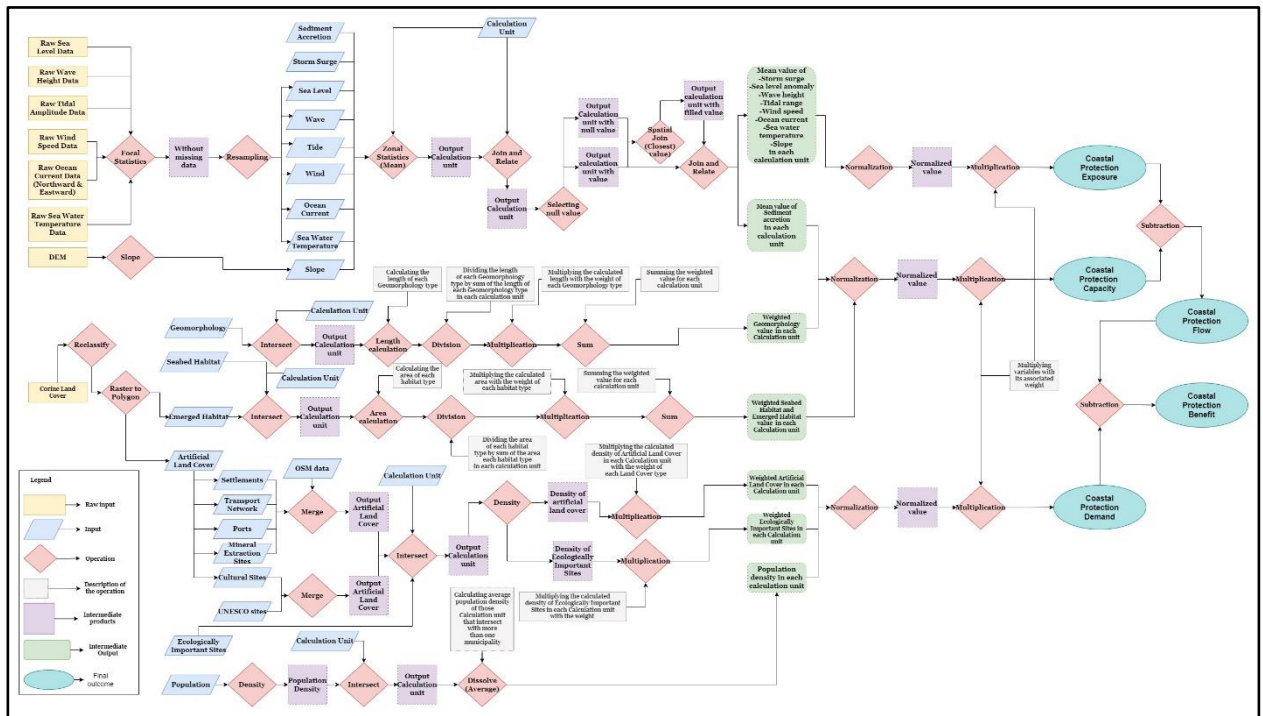

**Figure S1.** Workflow to assess coastal protection capacity, exposure, demand, service flow and benefit of the coastal areas of Greece.

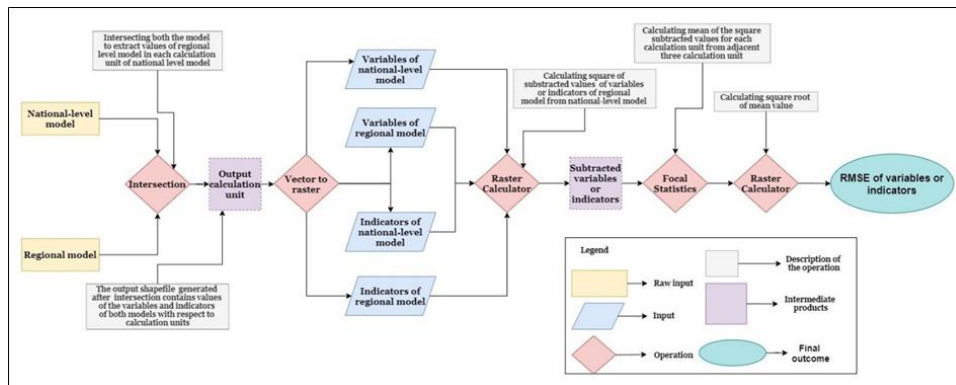

**Figure S2.** Workflow to compare the regional and national level model.

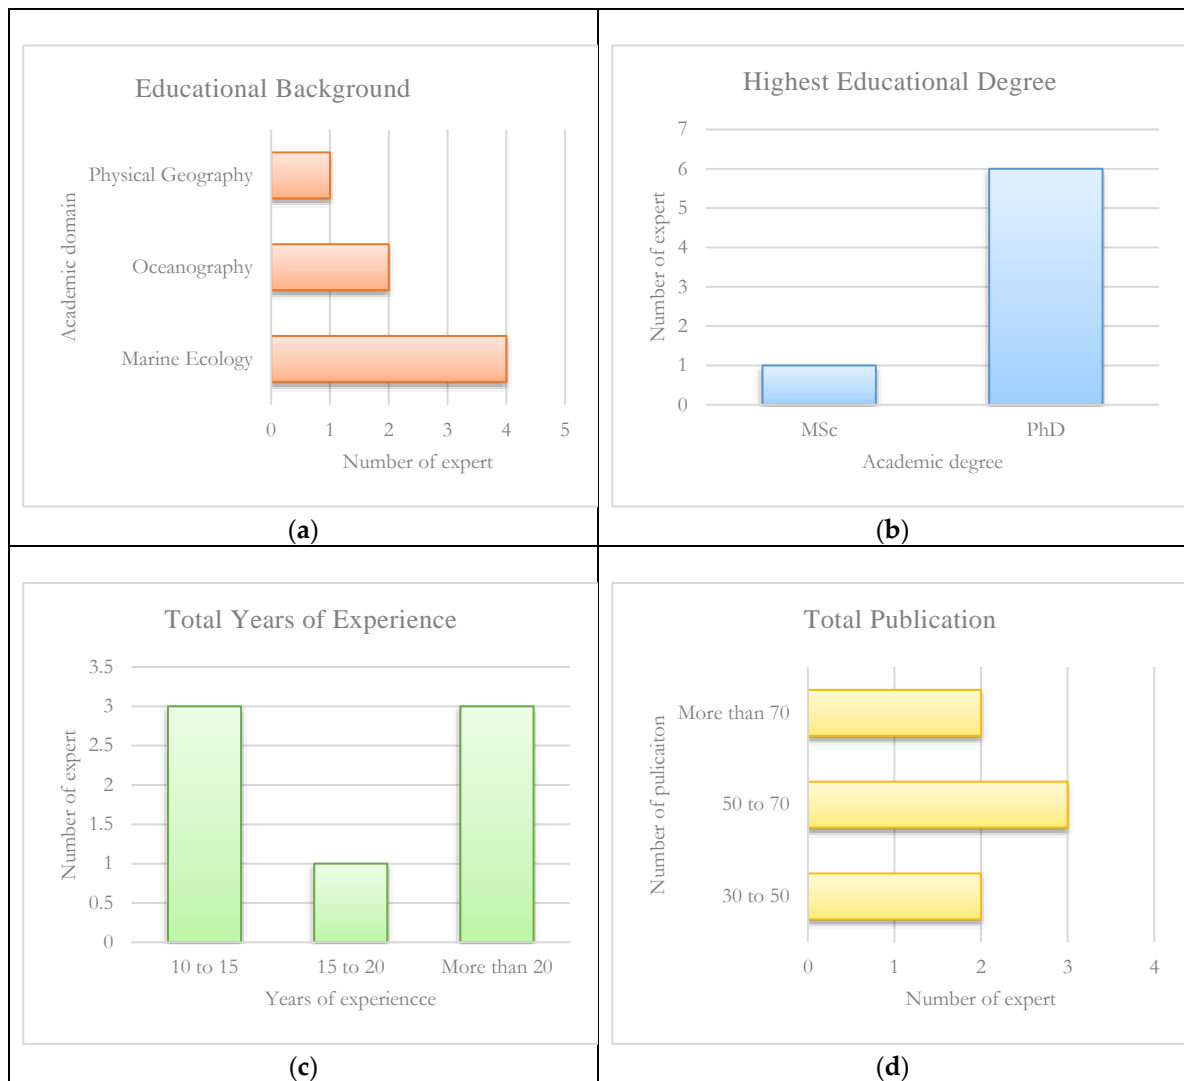

**Figure S3.** Expert's profile: **(a)** academic background of the experts, **(b)** level of education of the experts, **(c)** work experience of the experts, **(d)** total number of publications by the experts.

**Table S1.** Weights of the variables of coastal protection capacity indicator given by the experts.

| SN                                      | Geomorphology | Slope | Emerged Habitat | Seabed Habitat | Sediment Accumulation Rate | Total (Xi) |
|-----------------------------------------|---------------|-------|-----------------|----------------|----------------------------|------------|
| Expert 1                                | 3             | 3     | 2               | 3              | 3                          | 14         |
| Expert 2                                | 4             | 4     | 4               | 4              | 4                          | 20         |
| Expert 3                                | 4             | 3     | 3               | 3              | 4                          | 17         |
| Expert 4                                | 4             | 2     | 2               | 4              | 3                          | 15         |
| Expert 5                                | 4             | 4     | 2               | 3              | 4                          | 17         |
| Expert 6                                | 3             | 3     | 4               | 4              | 4                          | 18         |
| Expert 7                                | 4             | 4     | 2               | 4              | 4                          | 18         |
| Sum of weight of each variable (X)      | 26            | 23    | 19              | 25             | 26                         | 119        |
| Weight of each variable on a scale of 1 | 0.218         | 0.193 | 0.160           | 0.210          | 0.218                      | 1          |

**Table S2.** Weights of the variables of coastal protection exposure indicator given by the experts.

| SN                                      | Sea level rise | Storm surge height | Wave height | Tidal range | Wind Speed | Eastward Ocean Current | Northward Ocean Current | Sea Water Potential Temperature | Total (Xi) |
|-----------------------------------------|----------------|--------------------|-------------|-------------|------------|------------------------|-------------------------|---------------------------------|------------|
| Expert 1                                | 4              | 3                  | 4           | 3           | 4          | 1                      | 1                       | 1                               | 21         |
| Expert 2                                | 2              | 3                  | 3           | 2           | 3          | 1                      | 1                       | 1                               | 16         |
| Expert 3                                | 1              | 4                  | 3           | 2           | 4          | 2                      | 2                       | 1                               | 19         |
| Expert 4                                | 4              | 4                  | 4           | 2           | 2          | 1                      | 1                       | 1                               | 19         |
| Expert 5                                | 4              | 4                  | 3           | 1           | 3          | 2                      | 2                       | 1                               | 20         |
| Expert 6                                | 4              | 4                  | 3           | 4           | 2          | 1                      | 1                       | 1                               | 20         |
| Expert 7                                | 3              | 2                  | 3           | 3           | 2          | 2                      | 2                       | 2                               | 19         |
| Sum of weight of each variable (X)      | 22             | 24                 | 23          | 17          | 20         | 10                     | 10                      | 8                               | 134        |
| Weight of each variable on a scale of 1 | 0.164          | 0.179              | 0.172       | 0.127       | 0.149      | 0.075                  | 0.075                   | 0.060                           | 1          |

**Table S3.** Weights of the variables of coastal protection demand indicator given by the experts.

| SN                                            | Popula<br>tion<br>Densit<br>y | Settlements<br>(residential,<br>industrial,<br>commercial) | Cultural<br>site | Transport<br>network<br>(roads,<br>railway) | Ports<br>(airports,<br>ports) | Areas of<br>high<br>ecological<br>values | Mineral<br>extraction<br>site | Total<br>(Xi) |
|-----------------------------------------------|-------------------------------|------------------------------------------------------------|------------------|---------------------------------------------|-------------------------------|------------------------------------------|-------------------------------|---------------|
| Expert 1                                      | 4                             | 4                                                          | 4                | 4                                           | 4                             | 4                                        | 1                             | 25            |
| Expert 2                                      | 4                             | 2                                                          | 4                | 4                                           | 4                             | 4                                        | 1                             | 23            |
| Expert 3                                      | 4                             | 4                                                          | 3                | 3                                           | 4                             | 3                                        | 2                             | 23            |
| Expert 4                                      | 4                             | 4                                                          | 4                | 4                                           | 4                             | 4                                        | 2                             | 26            |
| Expert 5                                      | 3                             | 4                                                          | 3                | 4                                           | 4                             | 4                                        | 1                             | 23            |
| Expert 6                                      | 4                             | 4                                                          | 4                | 3                                           | 4                             | 4                                        | 4                             | 27            |
| Expert 7                                      | 3                             | 3                                                          | 3                | 4                                           | 4                             | 2                                        | 2                             | 21            |
| Sum<br>of weight of<br>each variable (X)      | 26                            | 25                                                         | 25               | 26                                          | 28                            | 25                                       | 13                            | 168           |
| Weight of each<br>variable on a<br>scale of 1 | 0.155                         | 0.149                                                      | 0.149            | 0.155                                       | 0.167                         | 0.149                                    | 0.077                         | 1             |

**Table S4.** Weights of the subtypes of seabed habitat variable given by the experts.

| SN                                         | Seabed Habitat<br>subtypes [Coarse<br>& mixed<br>sediment] | Seabed Habitat<br>subtypes<br>[Seagrass<br>meadows] | Seabed Habitat<br>subtypes<br>[Shallow<br>muds] | Seabed Habitat<br>subtypes<br>[Shallow sands] | Total<br>(Xi) |
|--------------------------------------------|------------------------------------------------------------|-----------------------------------------------------|-------------------------------------------------|-----------------------------------------------|---------------|
| Expert 1                                   | 4                                                          | 3                                                   | 2                                               | 3                                             | 12            |
| Expert 2                                   | 3                                                          | 4                                                   | 2                                               | 3                                             | 12            |
| Expert 3                                   | 3                                                          | 4                                                   | 2                                               | 1                                             | 10            |
| Expert 4                                   | 3                                                          | 4                                                   | 1                                               | 1                                             | 9             |
| Expert 5                                   | 2                                                          | 4                                                   | 3                                               | 1                                             | 10            |
| Expert 6                                   | 2                                                          | 4                                                   | 1                                               | 1                                             | 8             |
| Expert 7                                   | 4                                                          | 4                                                   | 2                                               | 2                                             | 12            |
| Sum<br>of weight of<br>each variable (X)   | 21                                                         | 27                                                  | 13                                              | 12                                            | 73            |
| Weight of each<br>variable on a scale of 1 | 0.288                                                      | 0.370                                               | 0.178                                           | 0.164                                         | 1             |

**Table S5.** Weights of the subtypes of geomorphology variable given by the experts.

| SN                                      | Rocks and/or cliffs made of hard rocks (little subject to erosion) | Rocks and/or cliffs with small beaches | Conglomerates and/or cliffs made of material subject to erosion: presence of rock waste and sediments (sand pebbles on the strand) | Small beaches separated by rocky capes | Developed beaches (length of the beach > 1 km) with strands made of coarse sediments: gravels or pebbles | Developed beaches with sandy strands: fine to coarse sand | Coastlines made of soft non-cohesive sediments | Strands made of muddy sediments: "waddens" and intertidal marshes with "slikkes and schorres" | Harbour areas | Coastal embankments for construction purposes (e.g. by emplacement of rocks earth etc.) | Soft strands with "beach rock" on intertidal strands | Soft strands of heterogeneous category grain size | Soft strands of unknown category grain size | Total (Xi) |
|-----------------------------------------|--------------------------------------------------------------------|----------------------------------------|------------------------------------------------------------------------------------------------------------------------------------|----------------------------------------|----------------------------------------------------------------------------------------------------------|-----------------------------------------------------------|------------------------------------------------|-----------------------------------------------------------------------------------------------|---------------|-----------------------------------------------------------------------------------------|------------------------------------------------------|---------------------------------------------------|---------------------------------------------|------------|
| Expert 1                                | 2                                                                  | 3                                      | 3                                                                                                                                  | 3                                      | 2                                                                                                        | 2                                                         | 2                                              | 1                                                                                             | 1             | 1                                                                                       | 1                                                    | 2                                                 | 2                                           | 25         |
| Expert 2                                | 4                                                                  | 3                                      | 1                                                                                                                                  | 2                                      | 3                                                                                                        | 3                                                         | 1                                              | 4                                                                                             | 2             | 1                                                                                       | 3                                                    | 3                                                 | 2                                           | 32         |
| Expert 3                                | 4                                                                  | 3                                      | 3                                                                                                                                  | 2                                      | 2                                                                                                        | 2                                                         | 1                                              | 1                                                                                             | 4             | 3                                                                                       | 2                                                    | 1                                                 | 1                                           | 29         |
| Expert 4                                | 4                                                                  | 4                                      | 1                                                                                                                                  | 2                                      | 1                                                                                                        | 1                                                         | 1                                              | 1                                                                                             | 3             | 2                                                                                       | 3                                                    | 2                                                 | 1                                           | 26         |
| Expert 5                                | 4                                                                  | 3                                      | 3                                                                                                                                  | 2                                      | 2                                                                                                        | 1                                                         | 1                                              | 2                                                                                             | 4             | 4                                                                                       | 3                                                    | 2                                                 | 2                                           | 33         |
| Expert 6                                | 4                                                                  | 4                                      | 3                                                                                                                                  | 3                                      | 3                                                                                                        | 1                                                         | 1                                              | 1                                                                                             | 3             | 3                                                                                       | 3                                                    | 1                                                 | 1                                           | 31         |
| Expert 7                                | 4                                                                  | 3                                      | 3                                                                                                                                  | 1                                      | 1                                                                                                        | 1                                                         | 1                                              | 1                                                                                             | 1             | 1                                                                                       | 1                                                    | 1                                                 | 1                                           | 20         |
| Sum of weight of each variable (X)      | 26                                                                 | 23                                     | 17                                                                                                                                 | 15                                     | 14                                                                                                       | 11                                                        | 8                                              | 11                                                                                            | 18            | 15                                                                                      | 16                                                   | 12                                                | 10                                          | 196        |
| Weight of each variable on a scale of 1 | 0.133                                                              | 0.117                                  | 0.087                                                                                                                              | 0.077                                  | 0.071                                                                                                    | 0.056                                                     | 0.041                                          | 0.056                                                                                         | 0.092         | 0.077                                                                                   | 0.082                                                | 0.061                                             | 0.0510                                      | 1          |

**Table S6.** Weights of the subtypes of emerged habitat variable given by the experts.

| SN                                      | Arable land | Beaches, dunes, sands | Coastal lagoons | Estuaries | Forests | Fruit trees | Heterogeneous agricultural areas | Open spaces with little or no vegetation | Pastures | Permanent crops | Scrub or herbaceous vegetation | Water courses | Wetlands | Total (Xi) |
|-----------------------------------------|-------------|-----------------------|-----------------|-----------|---------|-------------|----------------------------------|------------------------------------------|----------|-----------------|--------------------------------|---------------|----------|------------|
| Expert 1                                | 3           | 3                     | 1               | 1         | 2       | 2           | 4                                | 3                                        | 3        | 3               | 3                              | 1             | 1        | 30         |
| Expert 2                                | 1           | 4                     | 4               | 4         | 1       | 1           | 1                                | 4                                        | 1        | 1               | 3                              | 4             | 4        | 33         |
| Expert 3                                | 1           | 4                     | 3               | 3         | 4       | 1           | 2                                | 1                                        | 2        | 2               | 3                              | 4             | 4        | 34         |
| Expert 4                                | 1           | 1                     | 4               | 4         | 4       | 2           | 2                                | 1                                        | 1        | 2               | 2                              | 1             | 4        | 29         |
| Expert 5                                | 2           | 2                     | 1               | 1         | 3       | 2           | 2                                | 2                                        | 2        | 3               | 3                              | 1             | 1        | 25         |
| Expert 6                                | 1           | 2                     | 1               | 4         | 4       | 3           | 1                                | 1                                        | 1        | 3               | 2                              | 2             | 2        | 27         |
| Expert 7                                | 1           | 3                     | 2               | 2         | 1       | 1           | 1                                | 1                                        | 1        | 1               | 1                              | 1             | 1        | 17         |
| Sum of weight of each variable (X)      | 10          | 19                    | 16              | 19        | 19      | 12          | 13                               | 13                                       | 11       | 15              | 17                             | 14            | 17       | 195        |
| Weight of each variable on a scale of 1 | 0.051       | 0.097                 | 0.082           | 0.097     | 0.097   | 0.062       | 0.067                            | 0.067                                    | 0.056    | 0.077           | 0.087                          | 0.072         | 0.087    | 1          |
